# Supplementary material
Source: PubMed Central journal article supplement (PMC5040484)
Supplement: NIHMS70004-supplement-Supplementary_Appendices.pdf [file NIHMS70004-supplement-Supplementary_Appendices.pdf]

**APPENDIX A:** *Analytical calculation of SPEN diffusion effects upon employing linearly-swept 180° pulses*

This Appendix presents the results involved in calculating diffusion effects when employing 180° sweeps for performing the SPEN encoding, rather than the 90° chirp pulse used in the main text. Presenting such analysis is important, as 180° sweeps appear as the most promising way of decoupling the diffusion and the imaging gradients cross-coupling terms (*cf.* Fig. 4). By contrast to sequences using chirp 90° pulses to excite the spin packets, 180° sweeps in SPEN schemes are tuned to invert the spins in the transverse plane; excitation is thus created at the beginning of the experiment by a (usually slice-selective) homogeneous 90° pulse. As a result of this, the phase accumulated by spins during a gradient  $G_e$  of period  $T_e$  and a gradient  $G_a$  of duration  $T_a$  (*cf.* Fig. 2C)

is

$$K_{local}^{180^\circ-SPEN}(t, z) = \frac{d(\phi_e(z) + \phi_a(t, z))}{dz} = \frac{d}{dz} \begin{cases} \gamma G_e z t & 0 \leq t \leq t_{180}(z) \\ \phi_{rf}[t_{180}(z)] + [\phi_{rf}[t_{180}(z)] - \gamma G_e z [t_{180}(z)]] + \gamma G_e z [t - t_{180}(z)], & t_{180}(z) \leq t \leq T_e \\ 2\phi_{rf}[t_{180}(z)] - \gamma G_e z [t_{180}(z) - t] + \gamma G_a z t, & T_e \leq t \leq T_a \end{cases} \quad (A1)$$

Expressions for the timing  $t_{180}(z)$  when the adiabatic RF sweep reaches the resonance frequency of spin packet at a particular  $z$  coordinate, as well as for the phase  $\phi_{RF}$  taken by the  $B_1$  field at the time of this inversion, are similar to those given in the main text for the chirp  $90^\circ$  pulse. Taking the spatial derivatives involved in Eq. (A1) yields the relevant  $K_{local}$  wavenumbers,

$$K_{local}^{180^\circ-SPEN}(t, z) = \begin{cases} \gamma G_e t & 0 \leq t \leq t_{180}(z) \\ \gamma G_e [t - 2t_{180}(z)], & t_{180}(z) \leq t \leq T_e \\ \gamma G_e [T_e - 2t_{180}(z)] + \gamma G_a t, & T_e \leq t \leq T_a \end{cases} \quad (A2)$$

Substituting this expression into Eq. 8 provides the full argument of the exponential attenuation function,

$$A_{180^\circ-SPEN}(t, z) = \exp \left[ -D\gamma^2 \left( \frac{t_{180}^3(z)G_e^2 + G_e^2(t_{180}^3(z) + (-2t_{180}(z) + T_e)^3)}{3} + \frac{(2t_{180}(z)G_e - G_e T_e)^3 + (-2t_{180}(z)G_e + G_a T_a + G_e T_e)^3}{3G_a} \right) \right] \quad (A3)$$

These  $K_{local}$  and attenuation functions still have to account for the diffusion gradients  $G_d$ , and for the purging gradients  $G_{pr}$  that in  $180^\circ$ -encoded SPEN MRI are needed for shifting the symmetric phase parabola that the adiabatic sweep imparts, to one corner of the FOV (*cf.* Fig. 2C). Taking these additional factors into account, the total  $K_{local}$  wavenumber becomes

$$K_{local}(t, z) = \begin{cases} -\gamma G_{pr} t & 0 \leq t \leq T_{pr} \\ -\gamma G_{pr} T_{pr} + \gamma G_d (t - T_{pr}) & T_{pr} \leq t \leq T_{pr} + \delta \\ -\gamma G_{pr} T_{pr} + \gamma G_d \delta + \gamma G_e (t - (T_{pr} + \delta)) & T_{pr} + \delta \leq t \leq T_{pr} + \delta + t_{180}(z) \\ -\gamma G_{pr} T_{pr} + \gamma G_d \delta + \gamma G_e (t - 2t_{180}(z)) & T_{pr} + \delta + t_{180}(z) \leq t \leq T_{pr} + \delta + T_e \\ -\gamma G_{pr} T_{pr} + \gamma G_d \delta + \gamma G_e (T_e - 2t_{180}(z)) - \gamma G_d (t - (T_{pr} + \delta + T_e)) & T_{pr} + \delta + T_e \leq t \leq T_{pr} + \delta + \Delta \\ -\gamma G_{pr} T_{pr} + \gamma G_e (T_e - 2t_{180}(z)) + \gamma G_d t & T_{pr} + \delta + \Delta \leq t \leq T_{pr} + \delta + \Delta + T_a \end{cases} \quad (A4)$$

And the ensuing exponential attenuation function

$$A(t, z) = \exp \left[ -D\gamma^2 \left( \frac{G_{pr}^2 T_{pr}^3}{3} + \frac{\delta(G_d^2 \delta^2 - 3G_d \delta G_{pr} T_{pr} + 3G_{pr}^2 T_{pr}^2)}{3} + \frac{(G_d \delta + t_{180}(z)G_e - G_{pr} T_{pr})^3 + (-G_d \delta + G_{pr} T_{pr})^3}{3G_e} + \frac{(t_{180}(z)G_e - \delta(G_d + G_e) + (-G_e + G_{pr})T_{pr})^3}{3G_e} + \frac{(G_d \delta - 2t_{180}(z)G_e - G_{pr} T_{pr} + G_e(\Delta + T_{pr}))^3}{3G_e} + \frac{(-2t_{180}(z)G_e + G_e T_e + G_d(-\Delta + 2\delta + T_e) - G_{pr} T_{pr})^3}{3G_d} + \frac{(2t_{180}(z)G_e + G_d(\Delta - \delta - T_e) - G_e T_e + G_{pr} T_{pr})^3}{3G_d} + \frac{(-2t_{180}(z)G_e + G_a T_a + G_e T_e - G_{pr} T_{pr})^3}{3G_a} + \frac{(2t_{180}(z)G_e - G_e T_e + G_{pr} T_{pr})^3}{3G_a} \right) \right].$$

(A5)

**APPENDIX B:** *Experimental validation of exact vs. PGSE-based b-value effects in dSPEN sequence*

Figure B.1 assesses experimentally the efficiency of all the DW pulse sequences variants explored, with a series of single-scan 2D MRI comparisons conducted for water samples. Diffusion-sensitizing gradients were applied separately along the readout, the low-bandwidth (phase-encode or SPEN) and the slice-selection directions, such that the final ADC map is a geometric mean of the three directions. In all cases, a high consistency is evidenced by the diffusion coefficient values arising over the entire phantom sample for all five sequences –regardless of the diffusion-gradient’s encoding axis– once the correct *b*-values have been computed and are taken into account for computing the corresponding maps.

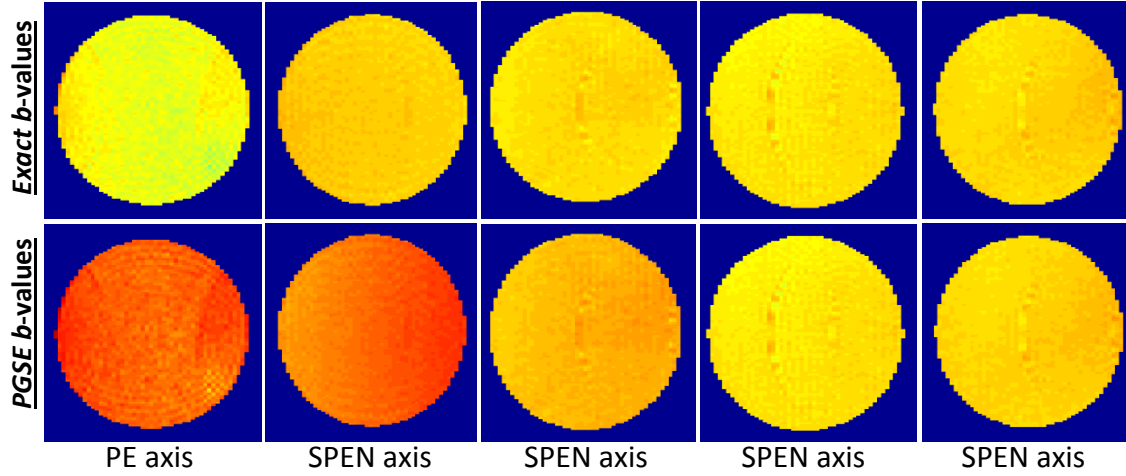

**Figure B1.** ADC maps derived from  $b^{Exact}$ - (top) and from  $b^{PGSE}$ -values (bottom) for a neat  $H_2O$  sample scanned by the five pulse sequences described in Fig. 2. PGSE parameters were  $\delta = 3\text{ms}$ ,  $\Delta = 14\text{ms}$  (except for Fig. 1D where  $\Delta = 11.4\text{ms}$ ),  $0.8 \leq G_d \leq 3.1$  G/cm gradients applied along all three measurements directions (readout, PE/SPEN and slice-selection). The maps represent an average of these three directions. The mean diffusion values arising over the entire phantom from  $b^{PGSE}$ - /  $b^{Exact}$ -values are:  $2.16 \pm 0.03$  /  $1.9 \pm 0.03$  (A);  $2.15 \pm 0.03$  /  $1.99 \pm 0.03$  (B);  $2.03 \pm 0.03$  /  $1.97 \pm 0.03$  (C);  $1.96.03 \pm 0.03$  /  $1.96 \pm 0.03$  (D);  $1.99 \pm 0.03$  /  $1.98 \pm 0.03$  (E) (all values  $\times 10^{-3}$   $\text{mm}^2/\text{s}$ ). Minor features disturbing the flatness of the images reflect artifacts arising from the various ultrafast imaging modalities. Common scanning parameters: square FOV =  $30 \times 30$   $\text{mm}^2$ , nominal resolution =  $0.4 \times 0.4$   $\text{mm}^2$ , 2 mm slice. Other gradient and timing values: (A)  $T_{90} = T_{180} = 2\text{ms}$ ,  $T_a = 21\text{ms}$ , total scan duration = 51.5ms; (B)  $T_{90} = T_a = 21\text{ms}$ ,  $G_e = 1.2$  G/cm,  $G_a = 4.5$  G/cm, total scan duration = 60ms; (C)  $T_{90} = 2\text{ms}$ ,  $T_{180} = T_a/2 = 10.5\text{ms}$ ,  $G_e = 0.8$  G/cm,  $G_a = 3$  G/cm, total scan duration = 51ms; (D)  $T_{90} = 2\text{ms}$ ,  $T_{180} = T_a/2 = 15.4\text{ms}$ ,  $G_e = 0.4$  G/cm,  $G_a = 4.4$  G/cm, total scan duration = 65ms; (E)  $T_{90} = 2\text{ms}$ ,  $T_{180} = T_a/2 = 10.5\text{ms}$ ,  $G_e = 0.8$  G/cm,  $G_a = 3$  G/cm, total scan duration = 62ms.
